# Supplementary material for: Implementation of Clinical Practice Guidelines for Empirical Antibiotic Therapy of Bacteremia, Urinary Tract Infection, and Pneumonia: A Multi-Center Quasi-Experimental Study
Source: MDPI journal article supplement (doi:10.3390/antibiotics11070903), 2022-07-06
Supplement: s1 [file s1]

## Supplementary Materials

**Table S1.** Clinical Practice Guidelines, Sakaeo Crown Prince Hospital.

| Targeted Infection | Types of infection and MDR risk                                 | Recommended empirical ATB                                | Notes                                                                                                                                                                                                                   |
|--------------------|-----------------------------------------------------------------|----------------------------------------------------------|-------------------------------------------------------------------------------------------------------------------------------------------------------------------------------------------------------------------------|
| Bacteraemia        | CAI, without MDR risk                                           | Ceftriaxone                                              | -If rickettsial infection is suspected: add doxycycline or azithromycin<br>-If <i>B. pseudomallei</i> is suspected: replace ceftriaxone with ceftazidime                                                                |
|                    | CAI, with MDR risk                                              | Amoxicillin/clavulanate or Piperacillin/tazobactam       | -If rickettsial infection is suspected: add doxycycline or azithromycin<br>-If <i>B. pseudomallei</i> is suspected: replace ceftriaxone with ceftazidime                                                                |
|                    | HAI                                                             | Piperacillin/tazobactam or Meropenem                     | -If MRSA is suspected: add vancomycin                                                                                                                                                                                   |
|                    | HAI while receiving carbapenem                                  | Colistin                                                 | -If MRSA is suspected: add vancomycin                                                                                                                                                                                   |
| Targeted Infection | Types of infection and MDR risk                                 | Recommended empirical ATB                                | Notes                                                                                                                                                                                                                   |
| Pneumonia          | CAI, without MDR risk                                           | Ceftriaxone and azithromycin                             | -If aspiration pneumonia is suspected: replace ceftriaxone with Amoxicillin/clavulanate<br>-If influenza is suspected: add oseltamivir<br>-If <i>B. pseudomallei</i> is suspected: replace ceftriaxone with ceftazidime |
|                    | CAI, with MDR risk                                              | Ceftriaxone and azithromycin or Levofloxacin monotherapy | -If influenza is suspected: add oseltamivir<br>-If <i>B. pseudomallei</i> is suspected: replace ceftriaxone with ceftazidime                                                                                            |
|                    | HAI                                                             | Piperacillin/tazobactam or Meropenem                     | -If MRSA is suspected: add vancomycin                                                                                                                                                                                   |
|                    | HAI with suspected carbapenem-resistant gram-negative organisms | Colistin                                                 | -If MRSA is suspected: add vancomycin                                                                                                                                                                                   |
| Targeted Infection | Types of infection and MDR risk                                 | Recommended empirical ATB                                | Notes                                                                                                                                                                                                                   |
| UTI                | CAI, without MDR risk                                           | Ceftriaxone                                              | -If mild clinical syndrome, no shock or hypotension: oral cephalosporin could be used                                                                                                                                   |

|  |                                                                       |                                                                                                   |                                                                                                                             |
|--|-----------------------------------------------------------------------|---------------------------------------------------------------------------------------------------|-----------------------------------------------------------------------------------------------------------------------------|
|  | CAI, with MDR risk                                                    | -Amikacin<br>or<br>-IV<br>Amoxicillin/clavulanate<br><br>-Piperacillin/tazobactam<br>or Ertapenem | -Normal renal function<br><br>-Impaired renal function<br><br>-If 3rd generation<br>cephalosporin resistant is<br>suspected |
|  | HAI                                                                   | Piperacillin/tazobactam<br>or Ertapenem<br>or Meropenem                                           | -If MRSA or<br><i>Enterococcus faecium</i> is<br>suspected: add<br>vancomycin                                               |
|  | HAI with suspected<br>carbapenem-resistant<br>gram-negative organisms | Colistin                                                                                          | -If MRSA or<br><i>Enterococcus faecium</i> is<br>suspected: add<br>vancomycin                                               |

**Table S2.** Clinical Practice Guidelines, Surin Hospital.

| Targeted Infection | Types of infection and MDR risk                                 | Recommended empirical ATB                                            | Notes                                                                                                                                                                                                                   |
|--------------------|-----------------------------------------------------------------|----------------------------------------------------------------------|-------------------------------------------------------------------------------------------------------------------------------------------------------------------------------------------------------------------------|
| Bacteraemia        | CAI, without MDR risk                                           | Ceftriaxone                                                          | -If rickettsial infection is suspected: add doxycycline or azithromycin<br>-If <i>B. pseudomallei</i> is suspected: replace ceftriaxone with ceftazidime                                                                |
|                    | CAI, with MDR risk                                              | Amoxicillin/clavulanate or Piperacillin/tazobactam                   | -If rickettsial infection is suspected: add doxycycline or azithromycin<br>-If <i>B. pseudomallei</i> is suspected: replace ceftriaxone with ceftazidime                                                                |
|                    | HAI                                                             | Piperacillin/tazobactam or Meropenem                                 | -If MRSA is suspected: add vancomycin                                                                                                                                                                                   |
|                    | HAI while receiving carbapenem                                  | Colistin                                                             | -If MRSA is suspected: add vancomycin                                                                                                                                                                                   |
| Targeted Infection | Types of infection and MDR risk                                 | Recommended empirical ATB                                            | Notes                                                                                                                                                                                                                   |
| Pneumonia          | CAI, without MDR risk                                           | Ceftriaxone and azithromycin                                         | -If aspiration pneumonia is suspected: replace ceftriaxone with Amoxicillin/clavulanate<br>-If influenza is suspected: add oseltamivir<br>-If <i>B. pseudomallei</i> is suspected: replace ceftriaxone with ceftazidime |
|                    | CAI, with MDR risk                                              | Ceftriaxone and azithromycin or Levofloxacin monotherapy             | -If influenza is suspected: add oseltamivir<br>-If <i>B. pseudomallei</i> is suspected: replace ceftriaxone with ceftazidime                                                                                            |
|                    | HAI                                                             | Piperacillin/tazobactam or Meropenem                                 | -If MRSA is suspected: add vancomycin                                                                                                                                                                                   |
|                    | HAI with suspected carbapenem-resistant gram-negative organisms | Colistin                                                             | -If MRSA is suspected: add vancomycin                                                                                                                                                                                   |
| Targeted Infection | Types of infection and MDR risk                                 | Recommended empirical ATB                                            | Notes                                                                                                                                                                                                                   |
| UTI                | CAI, without MDR risk                                           | Ceftriaxone                                                          | -If mild clinical, no shock or hypotension: oral cephalosporin could be used                                                                                                                                            |
|                    | CAI, with MDR risk                                              | -Amikacin<br>-IV Amoxicillin/clavulanate<br>-Piperacillin/tazobactam | -Normal renal function<br>-Abnormal renal function<br>-If 3rd generation                                                                                                                                                |

|  |                                                                 |                                                   |                                                                      |
|--|-----------------------------------------------------------------|---------------------------------------------------|----------------------------------------------------------------------|
|  |                                                                 | or Ertapenem                                      | cephalosporin resistant is suspected and normal renal function       |
|  | HAI                                                             | Piperacillin/tazobactam or Ertapenem or Meropenem | -If MRSA or <i>Enterococcus faecium</i> is suspected: add vancomycin |
|  | HAI with suspected carbapenem-resistant gram-negative organisms | Colistin                                          | -If MRSA or <i>Enterococcus faecium</i> is suspected: add vancomycin |

**Table S3.** Clinical Practice Guidelines, Surat Thani Hospital.

| Targeted Infection | Types of infection and MDR risk                                 | Recommended empirical ATB                                                            | Notes                                                                                                                                       |
|--------------------|-----------------------------------------------------------------|--------------------------------------------------------------------------------------|---------------------------------------------------------------------------------------------------------------------------------------------|
| Bacteraemia        | CAI, without MDR risk                                           | Ceftriaxone                                                                          | -If rickettsial infection is suspected: add doxycycline or azithromycin                                                                     |
|                    | CAI, with MDR risk                                              | Amoxicillin/clavulanate or Piperacillin/tazobactam                                   | -If rickettsial infection is suspected: add doxycycline or azithromycin                                                                     |
|                    | HAI                                                             | Piperacillin/tazobactam or Meropenem                                                 | -If MRSA is suspected: add vancomycin                                                                                                       |
|                    | HAI while receiving carbapenem                                  | Colistin                                                                             | -If MRSA is suspected: add vancomycin                                                                                                       |
| Targeted Infection | Types of infection and MDR risk                                 | Recommended empirical ATB                                                            | Notes                                                                                                                                       |
| Pneumonia          | CAI, without MDR risk                                           | Ceftriaxone and azithromycin                                                         | -If aspiration pneumonia is suspected: replace ceftriaxone with Amoxicillin/clavulanate<br>-If influenza is suspected: add oseltamivir      |
|                    | CAI, with MDR risk                                              | Ceftriaxone and azithromycin or Levofloxacin monotherapy                             | -If influenza is suspected: add oseltamivir                                                                                                 |
|                    | HAI                                                             | Piperacillin/tazobactam or Meropenem                                                 | -If MRSA is suspected: add vancomycin                                                                                                       |
|                    | HAI with suspected carbapenem-resistant gram-negative organisms | Colistin                                                                             | -If MRSA is suspected: add vancomycin                                                                                                       |
| Targeted Infection | Types of infection and MDR risk                                 | Recommended empirical ATB                                                            | Notes                                                                                                                                       |
| UTI                | CAI, without MDR risk                                           | Ceftriaxone                                                                          | -If mild clinical, no shock or hypotension: oral cephalosporin could be used                                                                |
|                    | CAI, with MDR risk                                              | -Amikacin<br>-IV<br>Amoxicillin/clavulanate<br>-Piperacillin/tazobactam or Ertapenem | -Normal renal function<br>-Abnormal renal function<br><br>-If 3rd generation cephalosporin resistant is suspected and normal renal function |
|                    | HAI                                                             | Piperacillin/tazobactam or Ertapenem or Meropenem                                    | -If MRSA or Enterococcus faecium is suspected: add vancomycin                                                                               |
|                    | HAI with suspected carbapenem-resistant gram-negative organisms | Colistin                                                                             | -If MRSA or Enterococcus faecium is suspected: add vancomycin                                                                               |

### **Abbreviations and definitions for CPGs.**

- CAIs, community-acquired infections: onset of symptoms occurs before hospitalisation/within 48 hours after hospitalisation and there are no healthcare associated conditions potentially related to infection (i.e., chronic haemodialysis, in-dwelling urinary catheter).
- HAIs, hospital-acquired infections: onset of symptoms occurs >48 hours after hospitalisation or there are healthcare associated conditions potentially related to infection (i.e., chronic haemodialysis, in-dwelling urinary catheter).
- MDR, multidrug resistant.
- MRSA, methicillin-resistant *Staphylococcus aureus*.

### **Risk factors for infection by MDR pathogens.**

- Hospitalisation within 90 days
- Antimicrobials use within 90 days
- Previous infection with antimicrobial resistant organisms
- Treatment in intensive care unit settings for longer than 48 hours
- Renal replacement therapy
- Medical device insertion or ventilator use longer than 48 hours
